# Supplementary material for: Diabetes Causes Dysfunctional Dopamine Neurotransmission Favoring Nigrostriatal Degeneration in Mice
Source: PubMed Central journal article supplement (PMC7818508; doi:10.1002/mds.28124), 2020-07-15
Supplement: MDS-35-1636-s009.pdf [file MDS-35-1636-s009.pdf]

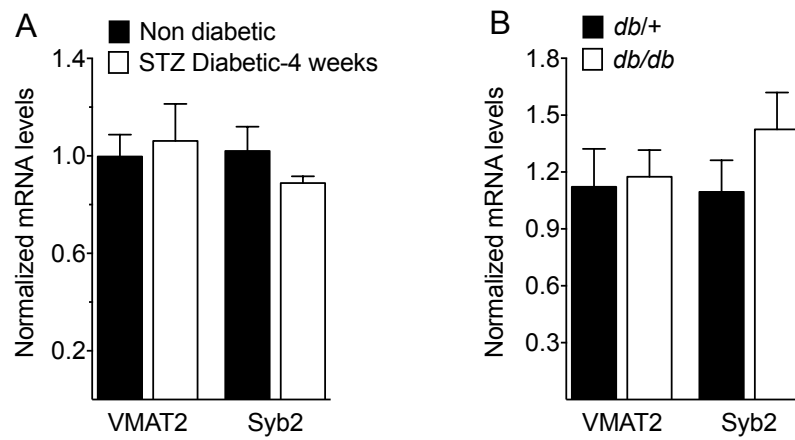

**Supplementary Figure 6.** Diabetes does not affect the expression of genes encoding the presynaptic proteins VMAT2 and synaptobrevin-2 (Syb2). Shown are the levels of expression of mRNA detected by RT-qPCR in the mesencephalic substantia nigra of STZ-treated or *db/db* diabetic mice and their respective controls (**A**, n = 6-7 per group; **B**, n = 8 per group).
